# Supplementary material for: Effect of Implementing a Free Delivery Service Policy on Women's Utilization of Facility-Based Delivery in Central Ethiopia: An Interrupted Time Series Analysis
Source: J Pregnancy. 2020 Dec 12;2020:8649598. doi: 10.1155/2020/8649598 (PMC7752279; doi:10.1155/2020/8649598)
Supplement: Supplementary Materials — Supplementary file 1: Table showing the list of health centers that removed user fees in July 2013 and those marked “X” were incomplete and discarded. Supplementary file 2: Table showing a clean dataset used for the analysis of facility delivery in East-Shewa zone, 2007-2016. [file 8649598.f1.zip]

Archive with 2 entries (2 files):
- Supplementary files/Supplementary file 1.doc
- Supplementary files/Supplementary file 2 .xls
