# Supplementary material for: Effect of Implementing a Free Delivery Service Policy on Women's Utilization of Facility-Based Delivery in Central Ethiopia: An Interrupted Time Series Analysis
Source: J Pregnancy. 2020 Dec 12;2020:8649598. doi: 10.1155/2020/8649598 (PMC7752279; doi:10.1155/2020/8649598)
Supplement: Supplementary Materials — Supplementary file 1: Table showing the list of health centers that removed user fees in July 2013 and those marked “X” were incomplete and discarded. Supplementary file 2: Table showing a clean dataset used for the analysis of facility delivery in East-Shewa zone, 2007-2016. [file 8649598.f1.zip › Supplementary files/Supplementary file 2 .xls]

## Sheet: Sampled districsEast Shewa zone
month	Free delivery	Monthly number of deliveries per health facility					Total deliveries
		Adama	Awashmelkasa	Bishoftu	Modjo	Walinchity		Post FD
2007-06-01	0	0	0	0	0	0	0	0
2007-07-01	0	88	0	10	50	30	178	0
2007-08-01	0	99	3	10	47	27	186	0
2007-09-01	0	87	2	11	56	26	182	0
2007-10-01	0	89	2	10	52	29	182	0
2007-11-01	0	102	5	13	56	30	206	0
2007-12-01	0	92	5	9	53	37	196	0
2008-01-01	0	95	2	10	60	33	200	0
2008-02-01	0	90	4	8	58	30	190	0
2008-03-01	0	94	9	9	54	28	194	0
2008-04-01	0	102	2	8	51	29	192	0
2008-05-01	0	114	12	7	58	33	224	0
2008-06-01	0	87	6	10	61	38	202	0
2008-07-01	0	82	4	6	61	31	184	0
2008-08-01	0	94	6	8	57	25	190	0
2008-09-01	0	112	7	8	60	31	218	0
2008-10-01	0	98	6	8	56	36	204	0
2008-11-01	0	89	11	8	55	31	194	0
2008-12-01	0	99	10	8	60	29	206	0
2009-01-01	0	84	9	5	58	32	188	0
2009-02-01	0	96	4	8	63	25	196	0
2009-03-01	0	88	11	7	57	27	190	0
2009-04-01	0	88	7	5	57	25	182	0
2009-05-01	0	97	10	8	60	23	198	0
2009-06-01	0	92	7	5	60	26	190	0
2009-07-01	0	92	7	7	63	25	194	0
2009-08-01	0	82	22	7	55	24	190	0
2009-09-01	0	81.6667	33.3333	3.33333	48.3333	23.3333	190	0
2009-10-01	0	84.672	26.656	6.272	56.448	21.952	196	0
2009-11-01	0	87.4336	11.7699	3.36283	62.2124	25.2212	190	0
2009-12-01	0	104.971	2.05825	8.23301	67.9223	28.8155	212	0
2010-01-01	0	88.3929	12.375	5.30357	60.1071	31.8214	198	0
2010-02-01	0	85.6637	10.9027	4.67257	51.3982	23.3628	176	0
2010-03-01	0	103.028	15.5514	5.83178	60.2617	23.3271	208	0
2010-04-01	0	93.7391	10.2261	6.81739	56.2435	28.9739	196	0
2010-05-01	0	90.5366	12.4878	3.12195	60.878	24.9756	192	0
2010-06-01	0	94.1176	15.1261	6.72269	60.5042	23.5294	200	0
2010-07-01	0	78.3119	19.578	5.33945	65.8532	24.9174	194	0
2010-08-01	0	79.7321	18.6607	8.48214	61.0714	22.0536	190	0
2010-09-01	0	72.7344	32.6562	8.90625	56.4062	19.2969	190	0
2010-10-01	0	92.3306	25.9174	6.47934	50.2149	21.0579	196	0
2010-11-01	0	94.188	9.74359	11.3675	50.3419	24.359	190	0
2010-12-01	0	115.522	0	11.3628	62.4956	24.6195	214	0
2011-01-01	0	98.208	7.92	11.088	52.272	28.512	198	0
2011-02-01	0	75.4286	10.2857	6.85714	66.2857	17.1429	176	0
2011-03-01	0	113.75	11.375	11.375	52	19.5	208	0
2011-04-01	0	103.402	3.08661	12.3465	50.9291	26.2362	196	0
2011-05-01	0	101.908	7.38462	8.86154	50.2154	23.6308	192	0
2011-06-01	0	105.882	10.2941	13.2353	50	20.5882	200	0
2011-07-01	0	106.161	14.7445	7.37226	54.5547	19.1679	202	0
2011-08-01	0	101	11.5429	12.9857	54.8286	21.6429	202	0
2011-09-01	0	100.835	5.52518	9.66906	53.8705	22.1007	192	0
2011-10-01	0	98.6853	10.965	15.0769	52.0839	19.1888	196	0
2011-11-01	0	92	18.6667	12	53.3333	20	196	0
2011-12-01	0	92.6471	9.26471	13.2353	45	19.8529	180	0
2012-01-01	0	82.1227	4.76074	15.4724	76.1718	15.4724	194	0
2012-02-01	0	88.3221	17.6644	12.6174	49.2081	20.1879	188	0
2012-03-01	0	92.1625	16.4125	21.4625	51.7625	20.2	202	0
2012-04-01	0	95.6842	11.9605	17.2763	53.1579	23.9211	202	0
2012-05-01	0	89.6341	8.36585	22.7073	52.5854	22.7073	196	0
2012-06-01	0	100.28	8.72	20.3467	62.4933	26.16	218	0
2012-07-01	0	85.4171	17.3143	20.7771	51.9429	26.5486	202	0
2012-08-01	0	95.614	25.4971	21.6725	49.7193	25.4971	218	0
2012-09-01	0	91.4941	13.0706	22.5765	46.3412	28.5176	202	0
2012-10-01	0	90.6821	22.0578	22.0578	51.4682	25.7341	212	0
2012-11-01	0	94.573	15.1784	23.3514	54.8757	28.0216	216	0
2012-12-01	0	83.125	15.1136	21.5909	43.1818	26.9886	190	0
2013-01-01	0	89.2961	19.3073	27.7542	54.3017	25.3408	216	0
2013-02-01	0	86.0106	20.1064	26.8085	48.0319	29.0426	210	0
2013-03-01	0	82.8478	21.2717	27.9891	45.9022	27.9891	206	0
2013-04-01	0	93.5912	19.4475	26.7403	49.8343	30.3867	220	0
2013-05-01	0	91.7098	20.7876	34.2383	55.0259	34.2383	236	0
2013-06-01	0	84.4264	21.9289	25.2183	50.4365	33.9898	216	0
2013-07-01	1	76.9048	16.2857	17.1905	38	41.619	190	1
2013-08-01	1	96.7869	11.8033	24.7869	41.3115	41.3115	216	2
2013-09-01	1	96.9486	39.2411	25.3913	84.253	46.166	292	3
2013-10-01	1	85.3175	44.6429	21.8254	44.6429	53.5714	250	4
2013-11-01	1	89.7931	27.7931	28.8621	50.2414	51.3103	248	5
2013-12-01	1	88.7273	30.2479	24.1983	53.438	47.3884	244	6
2014-01-01	1	93.5508	34.9407	31.5593	51.8475	54.1017	266	7
2014-02-01	1	113.731	50.2531	37.0286	55.5429	67.4449	324	8
2014-03-01	1	94.5509	44.5585	33.6906	46.7321	68.4679	288	9
2014-04-01	1	91.3588	41.5267	34.2595	45.6794	59.1756	272	10
2014-05-01	1	92.194	51.9254	33.9104	47.6866	58.2836	284	11
2014-06-01	1	90.3557	23.0909	38.1502	45.1779	57.2253	254	12
2014-07-01	1	91.9927	48.5236	34.3709	50.5455	52.5673	278	13
2014-08-01	1	85.5385	47.8608	38.696	47.8608	58.044	278	14
2014-09-01	1	116.91	48.2888	48.2888	64.8087	73.704	352	15
2014-10-01	1	111.833	69.0032	49.9678	54.7267	84.4695	370	16
2014-11-01	1	104.698	53.9683	47.4921	52.8889	80.9524	340	17
2014-12-01	1	75.2832	53.896	35.0751	71.8613	59.8844	296	18
2015-01-01	1	88.0456	62.1498	48.684	53.8632	65.2573	318	19
2015-02-01	1	88.8328	63.5962	45.4259	55.5205	66.6246	320	20
2015-03-01	1	88.2848	55.178	47.1521	51.165	68.2201	310	21
2015-04-01	1	82.5243	52.4272	49.5146	51.4563	64.0777	300	22
2015-05-01	1	101.063	42.6711	58.392	61.7608	74.113	338	23
2015-06-01	1	86.9538	60.8677	47.3415	49.2738	69.5631	314	24
2015-07-01	1	76.2118	49.3645	50.2305	42.4361	59.757	278	25
2015-08-01	1	71.882	45.4426	42.9639	40.4852	51.2262	252	26
2015-09-01	1	71.1656	76.5031	52.4847	37.362	52.4847	290	27
2015-10-01	1	67.0306	67.7437	40.6462	34.2284	46.351	256	28
2015-11-01	1	72.2581	73.0792	48.4457	36.129	50.088	280	29
2015-12-01	1	65.1895	65.9475	44.723	35.6268	48.5131	260	30
2016-01-01	1	66.8807	66.055	50.367	35.5046	51.1927	270	31
2016-02-01	1	90.3444	82.8157	67.7583	47.3233	67.7583	356	32
2016-03-01	1	81.3913	69.764	43.6025	47.4783	69.764	312	33
2016-04-01	1	86.3977	94.7251	52.0468	47.883	74.9474	356	34
2016-05-01	1	73.5	67.2256	44.8171	43.0244	65.4329	294	35
2016-06-01	1	83.9219	71.6637	49.033	43.3754	66.006	314	36
